# Supplementary material
Source: PubMed Central journal article supplement (PMC4036826)
Supplement: NIHMS507212-supplement-ESI.pdf [file NIHMS507212-supplement-ESI.pdf]

## Supplementary Data

### **Multifunctional Chitosan Magnetic-Graphene (CMG) Nanoparticles: a Theranostic Platform for Tumor-targeted Co-delivery of Drugs, Genes and MRI Contrast Agents**

Chunyan Wang<sup>a,b</sup>, Sowndharya Ravi<sup>a</sup>, Ujjwala Sree Garapati<sup>a</sup>, Mahasweta Das<sup>b,c</sup>, Mark Howell<sup>a,b</sup>, Jaya Mallela<sup>a,b</sup>, Subbiah Alwarapapn<sup>b,c</sup>, Shyam Mohapatra<sup>b,c</sup> and Subhra Mohapatra<sup>a,b\*</sup>

<sup>a</sup> Molecular Medicine Department, <sup>b</sup>USF Nanomedicine Research Center, <sup>c</sup>Division of Translational Medicine, Department of Internal Medicine, Morsani College of Medicine, University of South Florida, 12901 Bruce B Downs Blvd, Tampa, FL, 33612, U.S.A.

## **Experimental Section**

### **1.1. Transmission Electron Microscopy (TEM) of GO, CRGO and MG**

The size distribution of GO, CRGO and MG was determined using a JEOL 1400 transmission electron microscope.

### **1.2 In vivo toxicity of DOX-CMG nanoparticles**

To assess the potential side effects of DOX-CMG nanoparticles, body weight changes were monitored after treatment. Nine mice were randomly divided into three groups. One hundred microliter of DOX-CMG nanoparticles and DOX in PBS solution were administered intravenously (via a tail vein) to the C57BL/6 mice at 2 mg/kg of body weight (three animals/group). Control group received PBS. At different times after treatment, the animals were anesthetized and weighed.

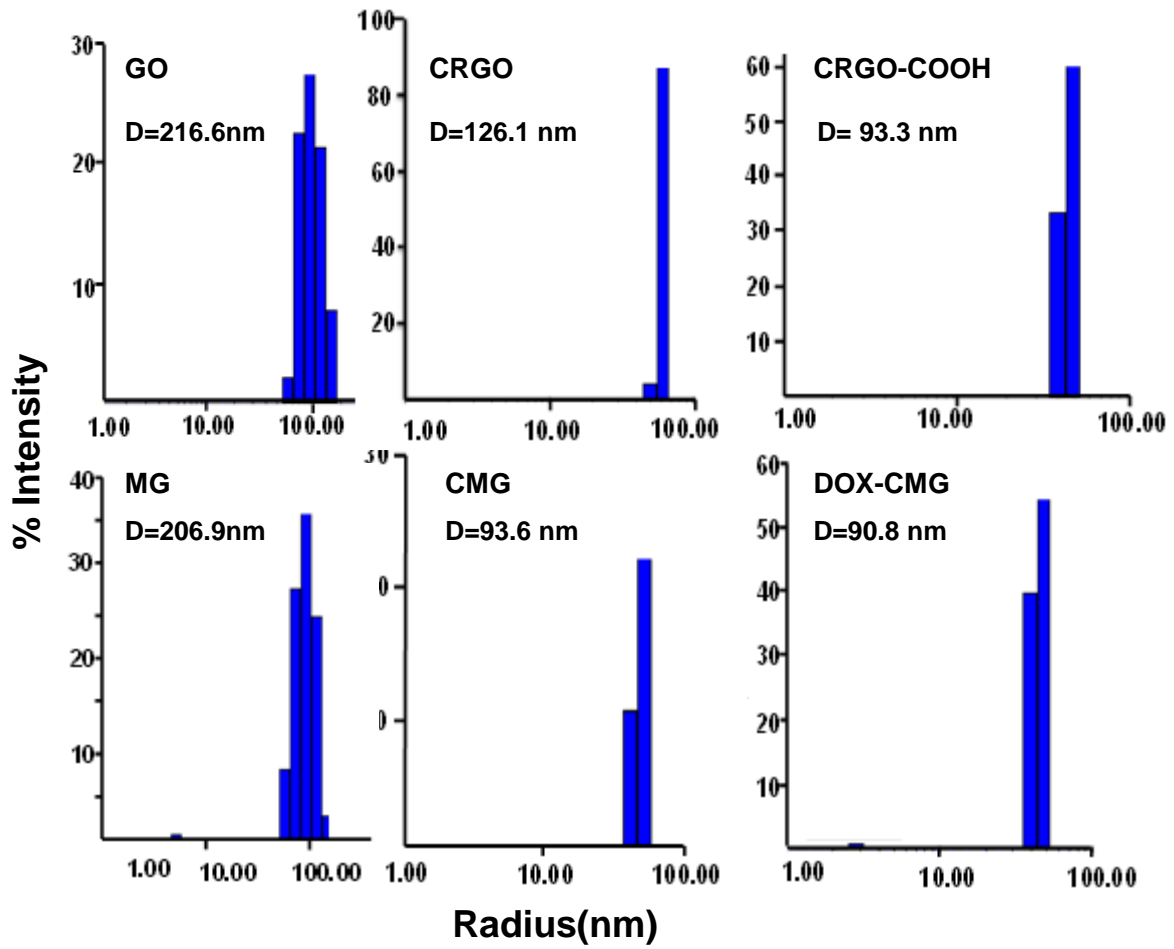

Figure S1: DLS shows the size distribution of GO, CRGO, CRGO-COOH, MG, CMG, DOX-CMG. (D, diameter)

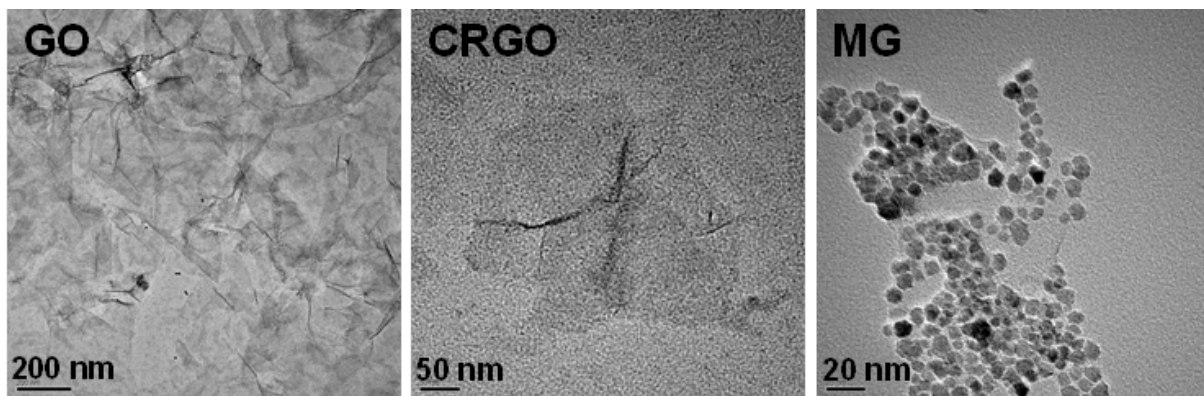

Figure S2, Transmission electron micrographs of GO, CRGO and MG

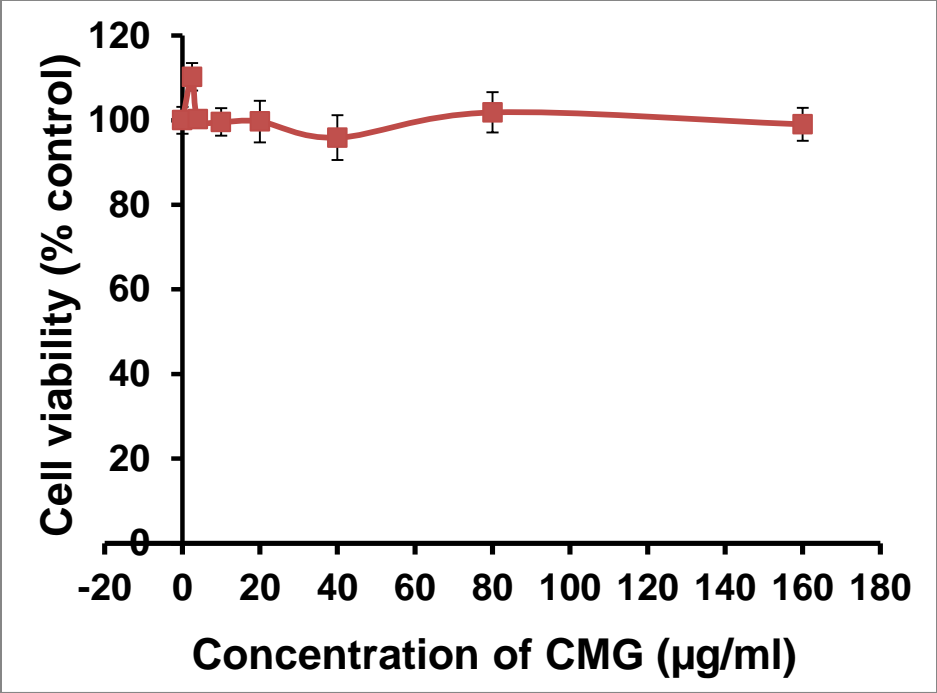

Figure S3, Viability of benign prostatic hyperplasia (BPH) cells treated with different concentrations of CMG.

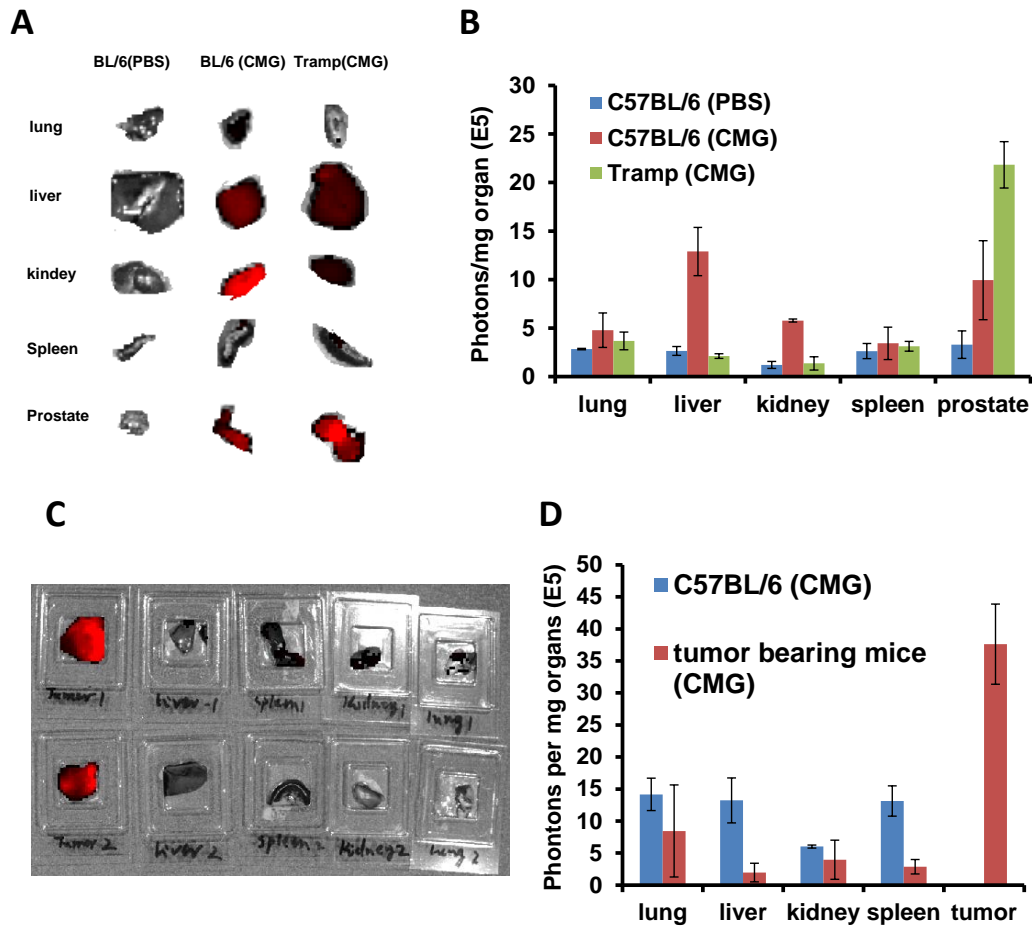

Figure S4: Biodistribution analyses of Cy5.5-CMG nanoparticles. Mice (n=2 per group) were injected i.p. with Cy5.5-CMG nanoparticles (500  $\mu$ l sample with 500  $\mu$ g CMG and 6.25  $\mu$ g Cy5.5) nanoparticles. Four hours after injection, mice were sacrificed, organs collected and fluorescence of organs was imaged via Xenogen IVIS (A & C). The average fluorescence intensity of each organ was normalized to the weight of each organ (B & D). (A-B) TRAMP mice. (C-D) LLC1 tumor-bearing mice.

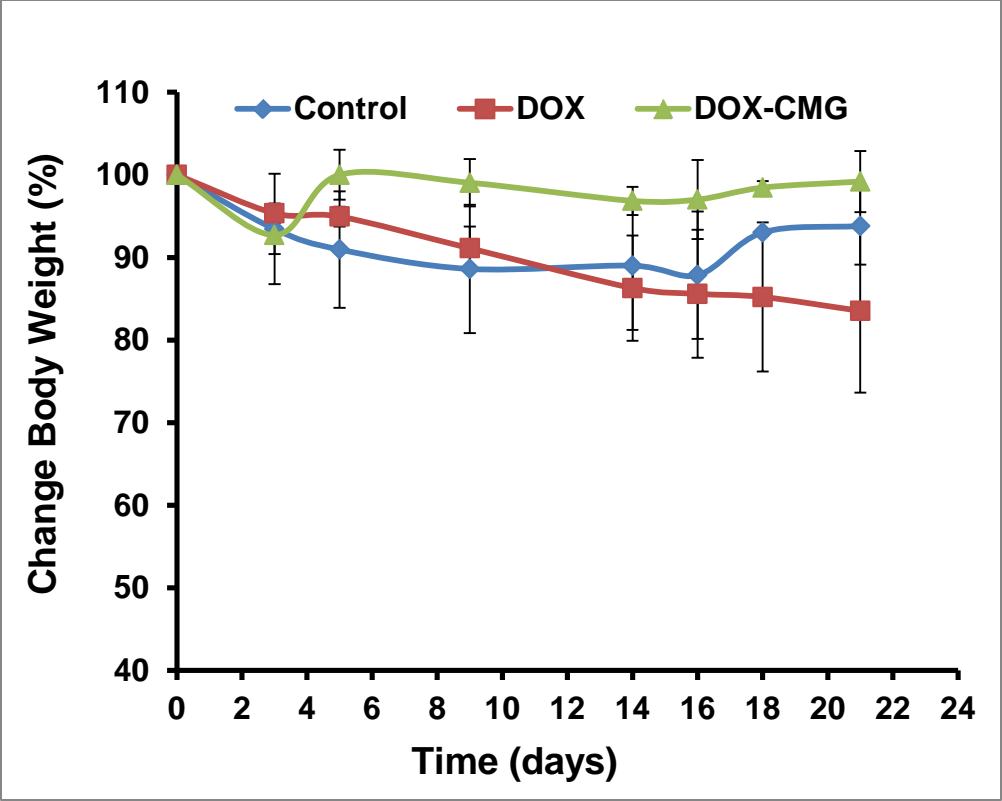

Figure S5: Percentage change in body weight with time post treatment. Body weight % =  $M_t/M_0 \times 100$  where  $M_0$  is the animal weight before injection and  $M_t$  is the animal weight at time t after injection. Each time-point represents mean  $\pm$  SD.

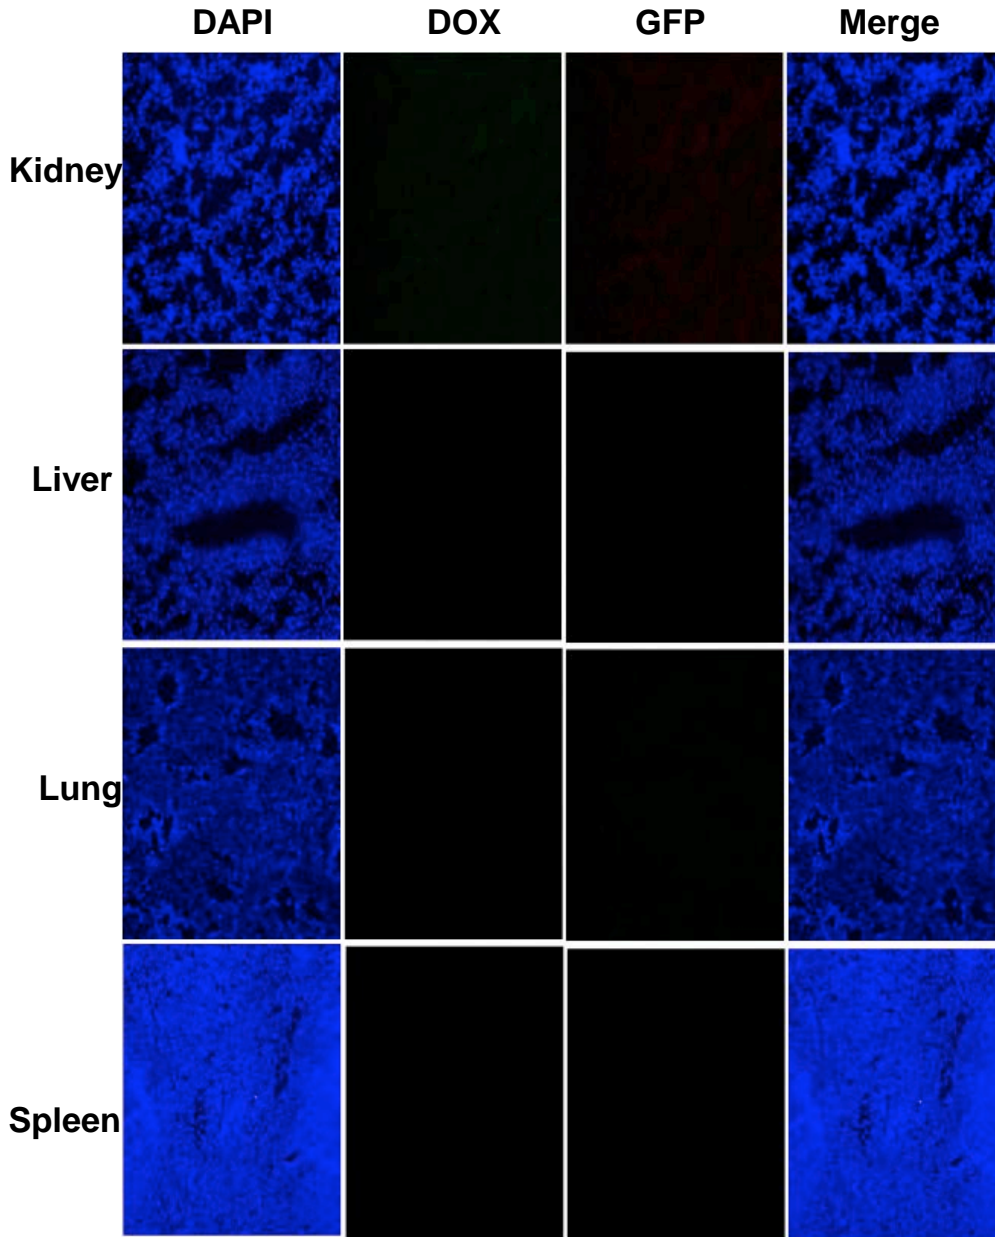

Figure S6: The represented images of DOX and GFP expression in LLC1 tumor-bearing mice. Mice (n=2 per group) were injected i.v. with DOX-CMG-GFP-DNA (30 $\mu$ g DOX and 25 $\mu$ g GFP-pDNA/mouse) nanoparticles. Twenty-four and forty-eight hours after injection, mice were sacrificed and frozen organ sections (Kidney, liver, lung, spleen) were examined for DOX and GFP. Magnification (100X).

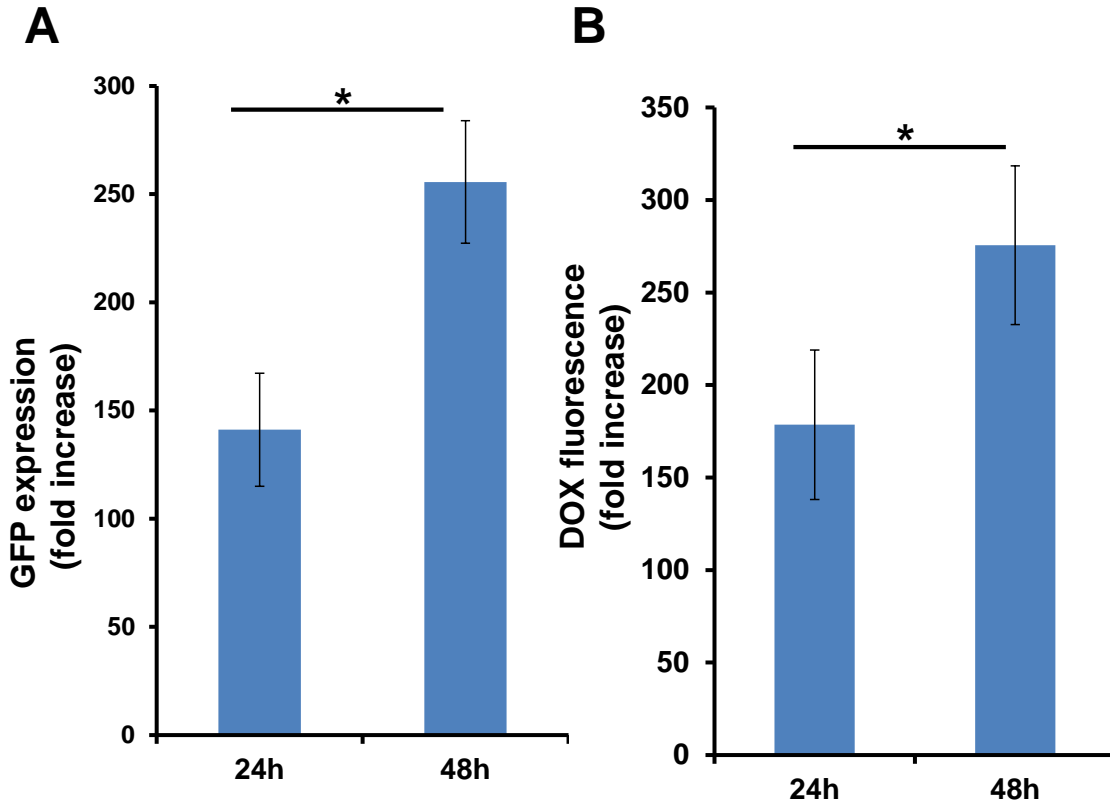

Figure S7: LLC1 tumor cells were implanted on both flanks (left and right flanks) of mice (n=2). Each mouse received a single i.p. injection of DOX-CMG-GFP-DNA. (30 $\mu$ g DOX, 25 $\mu$ g DNA/mouse, 500 $\mu$ l). 24 and 48 hrs after injection mice were sacrificed and frozen tumor sections were immunostained with anti-GFP antibody and nuclei were stained with DAPI. (A) GFP expression was normalized to the control background by image J,  $p < 0.05$  and (B) DOX fluorescence was normalized to the control background by image J,  $p < 0.05$ .
